# Supplementary material for: taxMaps: comprehensive and highly accurate taxonomic classification of short-read data in reasonable time
Source: PubMed Central journal article supplement — Genome Res. 2018 May;28(5):751–8. doi: 10.1101/gr.225276.117 (PMC5932614; doi:10.1101/gr.225276.117), 2018-05
Supplement: supp_gr.225276.117_Supplemental_Fig_S1.pdf [file supp_gr.225276.117_Supplemental_Fig_S1.pdf]

**A**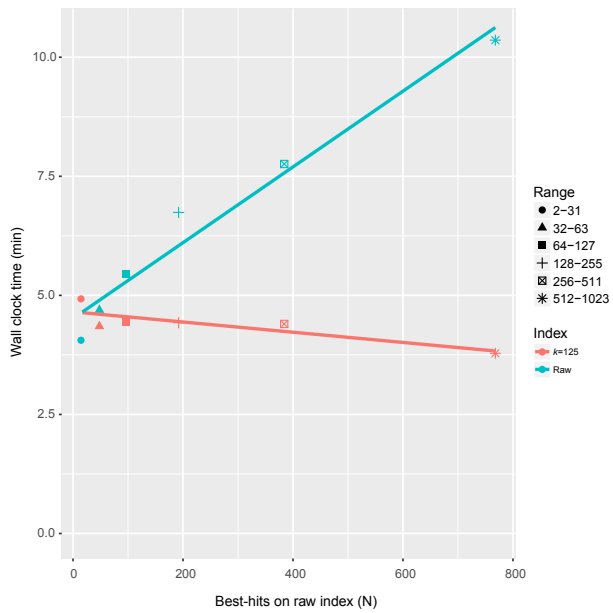**B**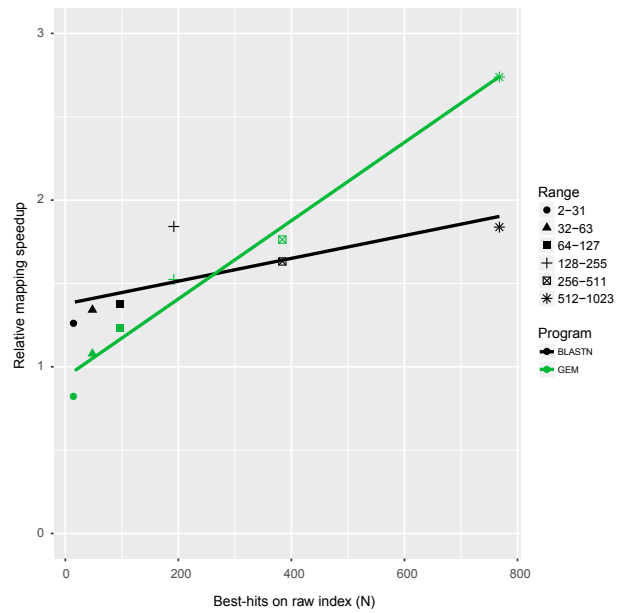

**Supplemental Figure S1 | Mapping performance on raw and compressed indexes.** (A) GEM runtimes for mapping 1M read-pairs against raw and compressed ( $k=125$ ) NCBI's nt database indexes, as a function of sequence redundancy. (B) Mapping speedup of BLASTN and GEM when using compressed indexes versus raw indexes, as a function of sequence redundancy.
