# Supplementary material for: taxMaps: comprehensive and highly accurate taxonomic classification of short-read data in reasonable time
Source: PubMed Central journal article supplement — Genome Res. 2018 May;28(5):751–8. doi: 10.1101/gr.225276.117 (PMC5932614; doi:10.1101/gr.225276.117), 2018-05
Supplement: supp_gr.225276.117_Supplemental_Fig_S3.pdf [file supp_gr.225276.117_Supplemental_Fig_S3.pdf]

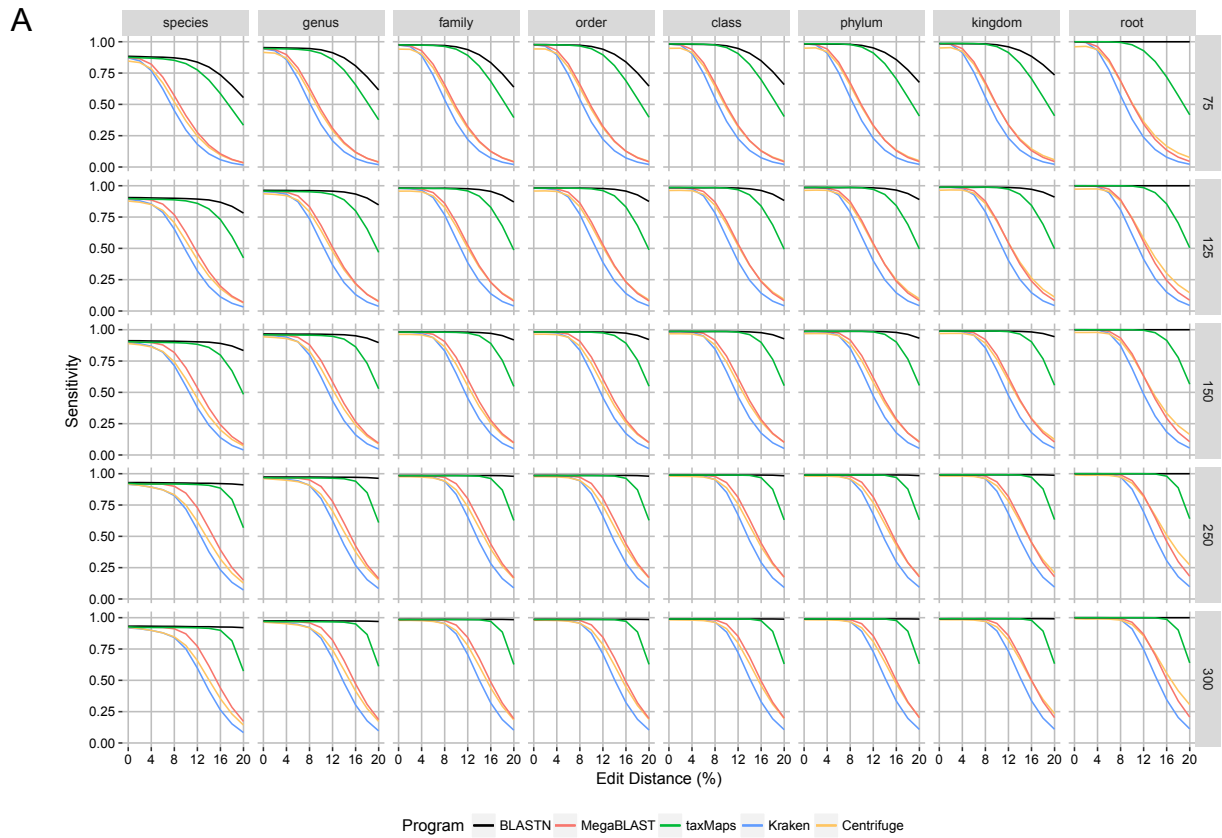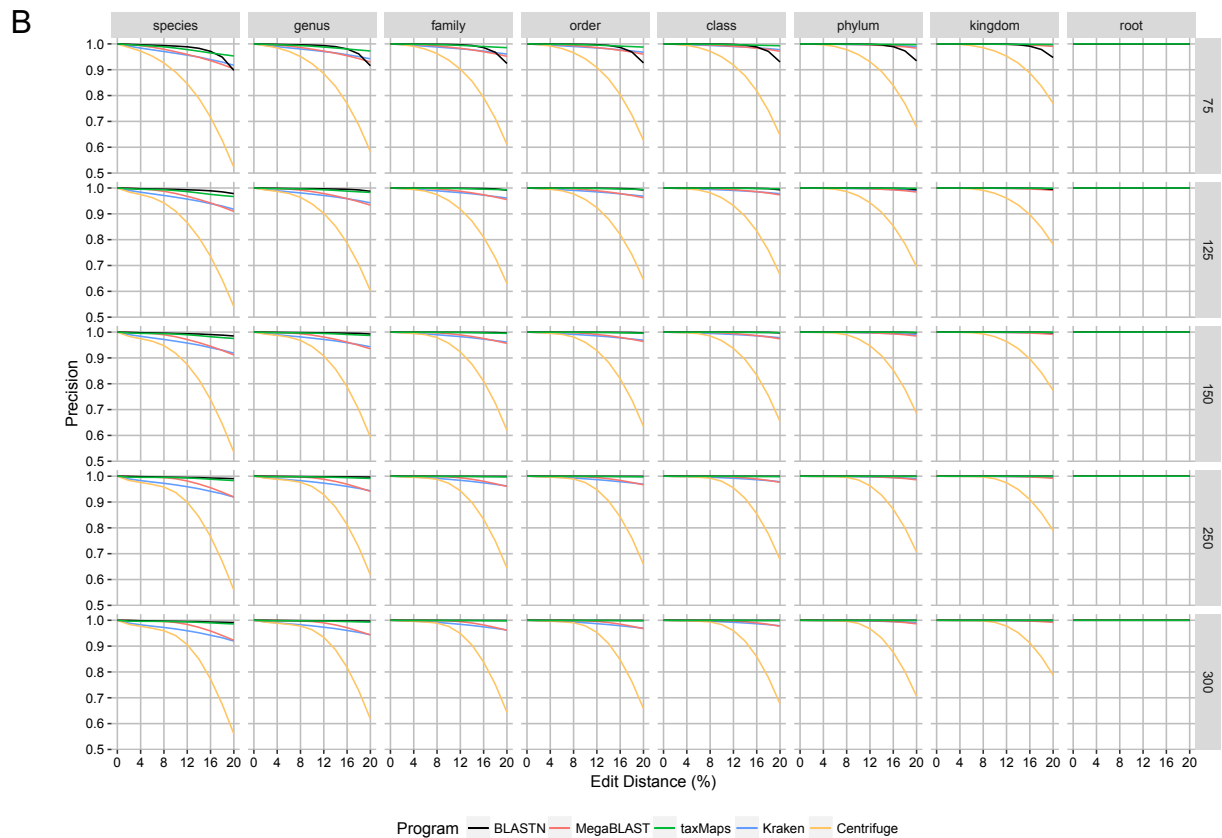

**Supplemental Figure S3 | Classification accuracy and performance on simulated metagenomics paired-end datasets.** Classification (A) sensitivity and (B) precision as function of average sequence divergence and read length for all the major taxonomic ranks.
