# Supplementary material for: taxMaps: comprehensive and highly accurate taxonomic classification of short-read data in reasonable time
Source: PubMed Central journal article supplement — Genome Res. 2018 May;28(5):751–8. doi: 10.1101/gr.225276.117 (PMC5932614; doi:10.1101/gr.225276.117), 2018-05
Supplement: supp_gr.225276.117_Supplemental_Fig_S5.pdf [file supp_gr.225276.117_Supplemental_Fig_S5.pdf]

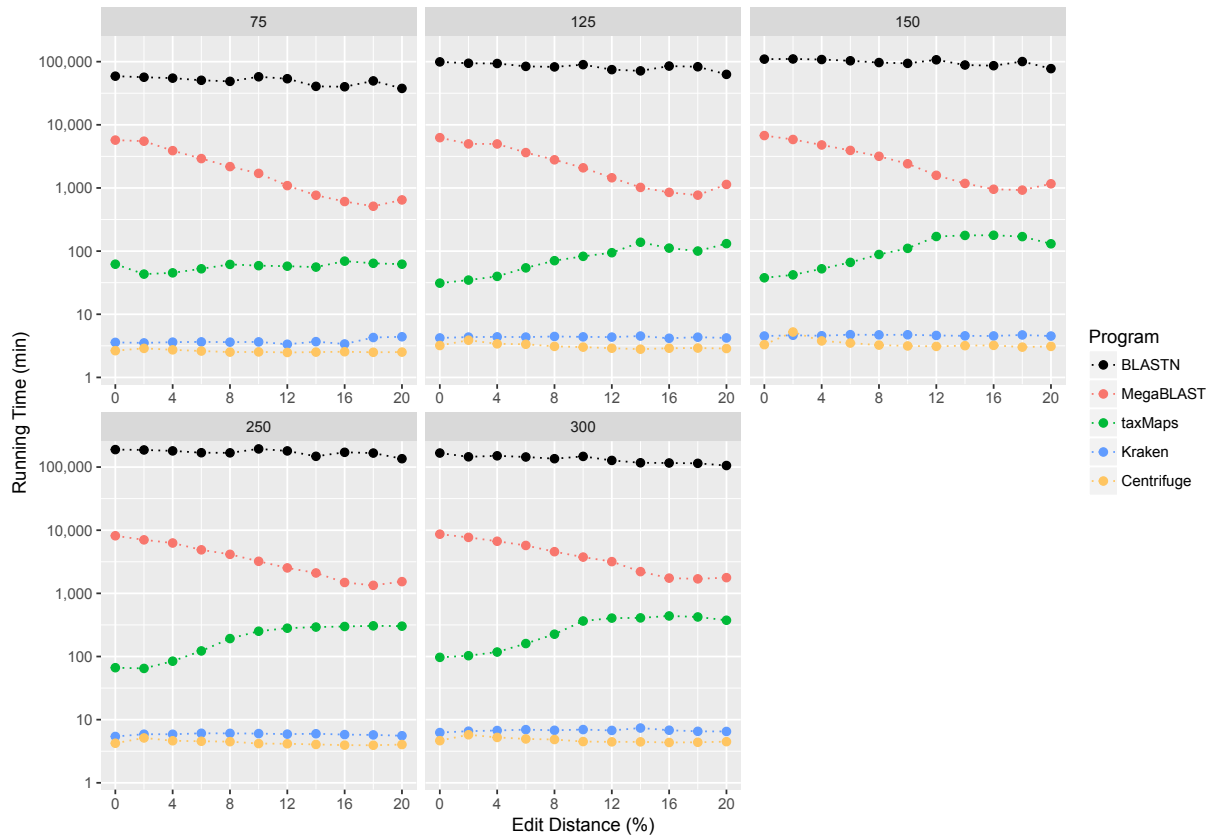

**Supplemental Figure S5 | Classification speed on simulated datasets.** Wall clock time required for the classification of 55 simulated datasets, each consisting of 10M read-pairs of varying length (indicated at the top of each panel), as a function of average sequence divergence.
