# Supplementary material for: taxMaps: comprehensive and highly accurate taxonomic classification of short-read data in reasonable time
Source: PubMed Central journal article supplement — Genome Res. 2018 May;28(5):751–8. doi: 10.1101/gr.225276.117 (PMC5932614; doi:10.1101/gr.225276.117), 2018-05
Supplement: supp_gr.225276.117_Supplemental_Fig_S6.pdf [file supp_gr.225276.117_Supplemental_Fig_S6.pdf]

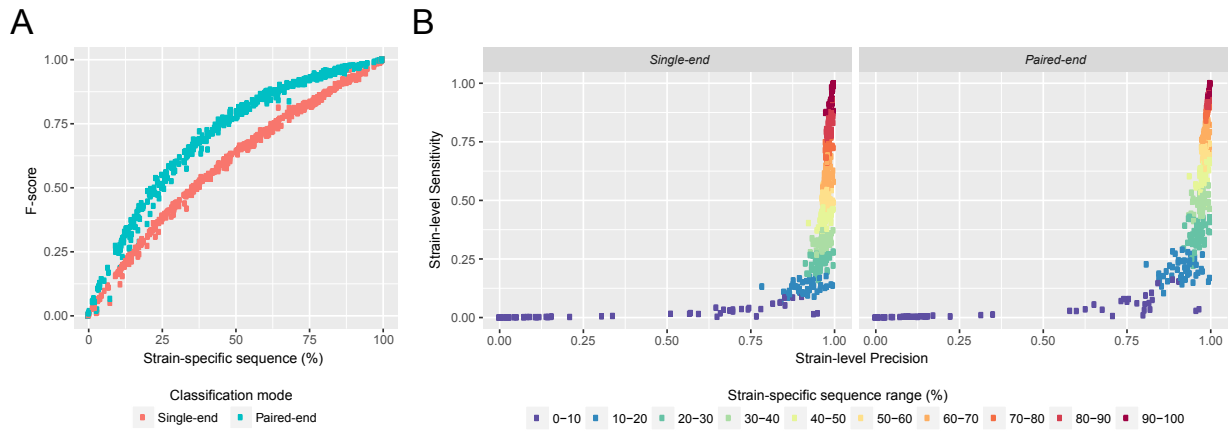

**Supplemental Figure S6 | taxMaps strain-level classification accuracy using single-end and paired-end modes. (A)** taxMaps strain-level classification F-score for 500 bacterial genomes, as a function of the percentage of strain-specific sequence. **(B)** taxMaps strain-level classification sensitivity and precision for the same set of genomes.
