# Supplementary material for: taxMaps: comprehensive and highly accurate taxonomic classification of short-read data in reasonable time
Source: PubMed Central journal article supplement — Genome Res. 2018 May;28(5):751–8. doi: 10.1101/gr.225276.117 (PMC5932614; doi:10.1101/gr.225276.117), 2018-05
Supplement: supp_gr.225276.117_Supplemental_Fig_S7.pdf [file supp_gr.225276.117_Supplemental_Fig_S7.pdf]

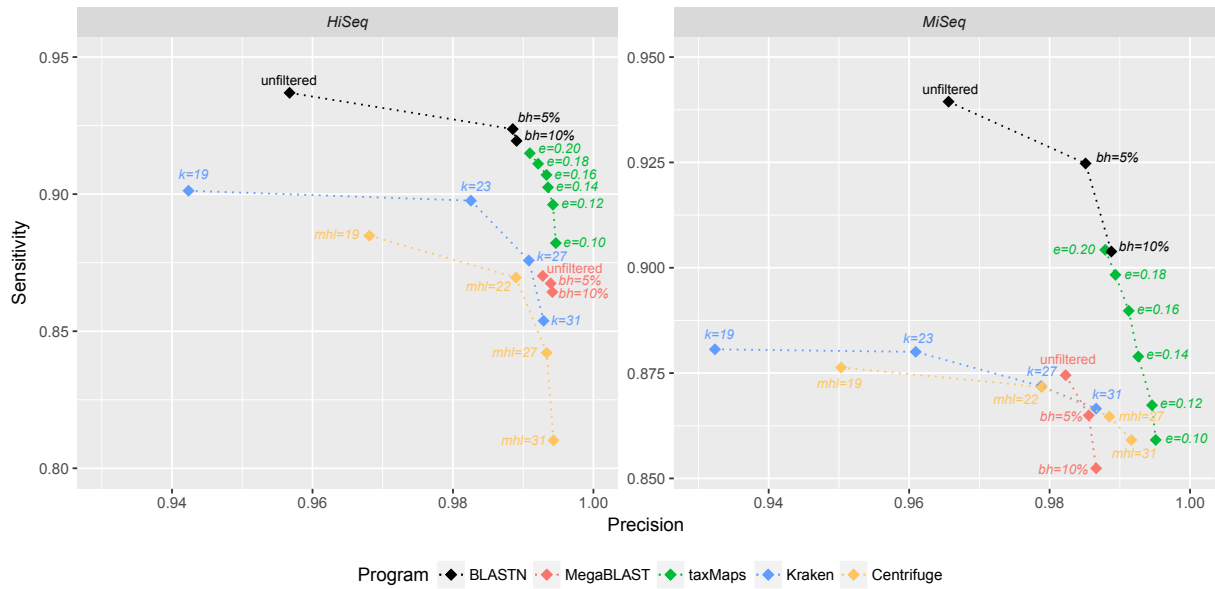

**Supplemental Figure S7 | Classification accuracy on two mock metagenomics communities.** Genus-level classification sensitivity and precision for two real datasets. The multiple series represent different choices of parameters in each program. For taxMaps, 6 values of maximum edit distance ( $-e$  parameter), ranging from the default 0.20 to 0.10 were explored. For BLASTN and MegaBLAST, the percentages indicated by each series reflect the distance from the best hit for a BLAST hit to be considered in the LCA calculation. For Kraken and Centrifuge, 4 different values of  $k$ -mer size ( $k$ ) and  $min$ -hitlen ( $mhl$ ) were explored, respectively.
