# Supplementary material for: taxMaps: comprehensive and highly accurate taxonomic classification of short-read data in reasonable time
Source: PubMed Central journal article supplement — Genome Res. 2018 May;28(5):751–8. doi: 10.1101/gr.225276.117 (PMC5932614; doi:10.1101/gr.225276.117), 2018-05
Supplement: supp_gr.225276.117_Supplemental_Fig_S8.pdf [file supp_gr.225276.117_Supplemental_Fig_S8.pdf]

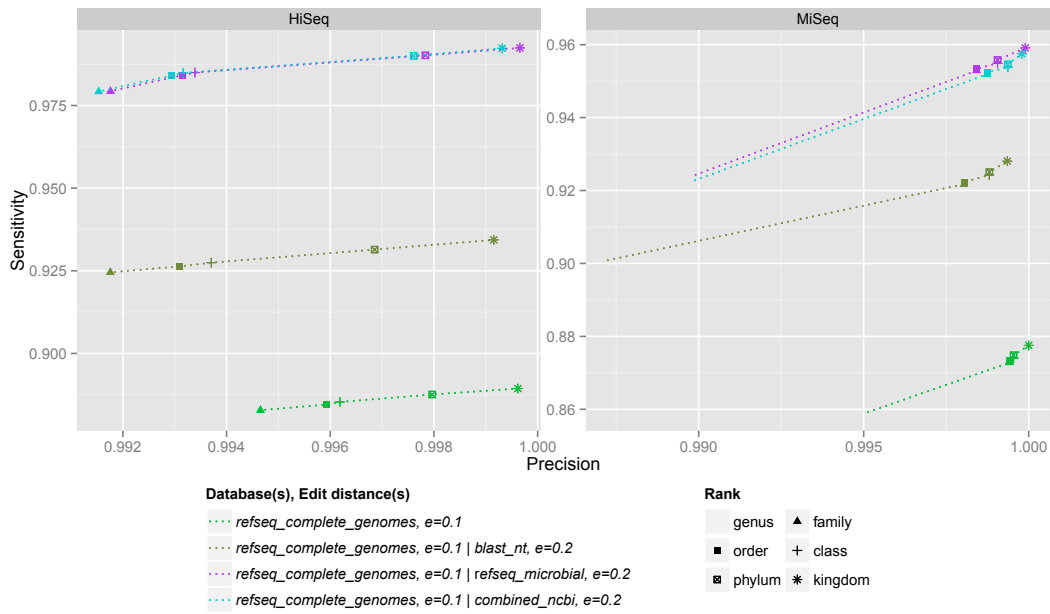

**Supplemental Figure S8 | taxMaps classification accuracy on two mock metagenomics communities using different index combinations.** Classification sensitivity and precision at six major taxonomic ranks for two real datasets, making use of mapping prioritization implemented in taxMaps, which allows for the use of multiple indexes, with independent parameters, in the same classification task.
