# Supplementary material for: taxMaps: comprehensive and highly accurate taxonomic classification of short-read data in reasonable time
Source: PubMed Central journal article supplement — Genome Res. 2018 May;28(5):751–8. doi: 10.1101/gr.225276.117 (PMC5932614; doi:10.1101/gr.225276.117), 2018-05
Supplement: supp_gr.225276.117_Supplemental_Fig_S9.pdf [file supp_gr.225276.117_Supplemental_Fig_S9.pdf]

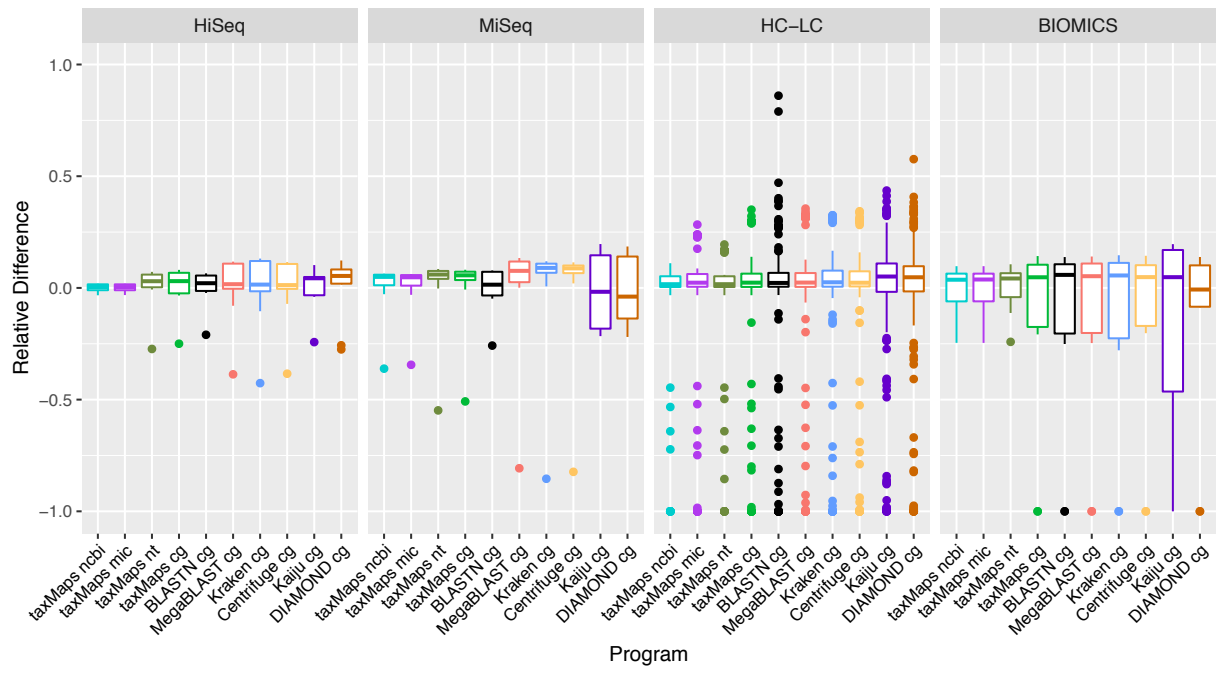

**Supplemental Figure S9 | Relative difference between estimated and real genus abundance on 4 mock metagenomics communities.** Genus abundance has been directly estimated from taxonomic classification by different tools and by making use of different indexes in taxMaps.
