# Supplementary material for: taxMaps: comprehensive and highly accurate taxonomic classification of short-read data in reasonable time
Source: PubMed Central journal article supplement — Genome Res. 2018 May;28(5):751–8. doi: 10.1101/gr.225276.117 (PMC5932614; doi:10.1101/gr.225276.117), 2018-05
Supplement: supp_gr.225276.117_Supplemental_Fig_S10.pdf [file supp_gr.225276.117_Supplemental_Fig_S10.pdf]

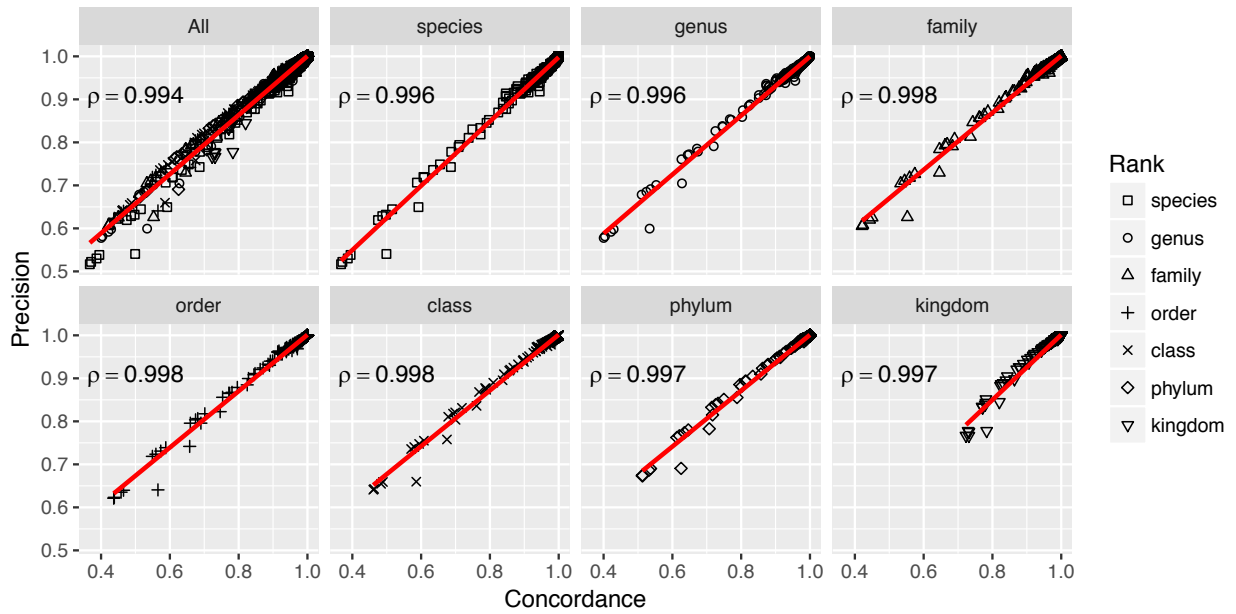

**Supplemental Figure S10 | Classification Concordance versus Precision.** Per rank correlation between paired-end classification concordance and precision on 55 simulated datasets, based on taxMaps, Kraken, MegaBLAST, Centrifuge and BLASTN single-end classification. For each rank, the corresponding Spearman's rank correlation coefficient  $\rho$  is indicated.
