# Supplementary material for: taxMaps: comprehensive and highly accurate taxonomic classification of short-read data in reasonable time
Source: PubMed Central journal article supplement — Genome Res. 2018 May;28(5):751–8. doi: 10.1101/gr.225276.117 (PMC5932614; doi:10.1101/gr.225276.117), 2018-05
Supplement: supp_gr.225276.117_Supplemental_Table_S1.pdf [file supp_gr.225276.117_Supplemental_Table_S1.pdf]

**Supplemental Table S1 | taxMaps databases.**

| Name                           | Included databases                                                              | N sequences<br>(N taxa) | Total<br>Length (Gb) | K-mer<br>Length (nt) | K-mers<br>(G) | Compressed<br>k-mers (G) | Compression<br>ratio | Required<br>RAM (GB) |
|--------------------------------|---------------------------------------------------------------------------------|-------------------------|----------------------|----------------------|---------------|--------------------------|----------------------|----------------------|
| <i>refseq_model_organisms</i>  | Selection of RefSeq genomes, including human                                    | 322129<br>(14)          | 16.683               | 75                   | 16.66         | 14.49                    | 1.15                 | 29.0                 |
|                                |                                                                                 |                         |                      | 125                  | 16.64         | 14.94                    | 1.11                 | 24.7                 |
|                                |                                                                                 |                         |                      | 150                  | 16.63         | 15.05                    | 1.11                 | 24.3                 |
|                                |                                                                                 |                         |                      | 300                  | 16.59         | 15.35                    | 1.08                 | 23.5                 |
| <i>refseq_complete_genomes</i> | Complete archaea, bacterial and viral genomes from RefSeq                       | 16022<br>(9460)         | 18.323               | 75                   | 18.32         | 9.70                     | 1.89                 | 23.0                 |
|                                |                                                                                 |                         |                      | 125                  | 18.32         | 10.23                    | 1.79                 | 21.1                 |
|                                |                                                                                 |                         |                      | 150                  | 18.32         | 10.42                    | 1.76                 | 20.7                 |
|                                |                                                                                 |                         |                      | 300                  | 18.32         | 11.17                    | 1.64                 | 20.3                 |
| <i>blast_nt</i>                | BLAST nt Database, excluding "other sequences" and "unclassified sequences"     | 34904805<br>(1109518)   | 114.518              | 75                   | 111.95        | 62.07                    | 1.80                 | 166.1                |
|                                |                                                                                 |                         |                      | 125                  | 110.23        | 64.96                    | 1.70                 | 147.8                |
|                                |                                                                                 |                         |                      | 150                  | 109.38        | 65.77                    | 1.66                 | 143.1                |
|                                |                                                                                 |                         |                      | 300                  | 104.43        | 67.56                    | 1.55                 | 137.8                |
| <i>refseq_microbial</i>        | Archaea, bacteria, fungi, protozoa and viral genomes from RefSeq                | 6516024<br>(35641)      | 242.673              | 75                   | 242.19        | 51.82                    | 4.67                 | 146.3                |
|                                |                                                                                 |                         |                      | 125                  | 241.87        | 56.30                    | 4.30                 | 134.9                |
|                                |                                                                                 |                         |                      | 150                  | 241.70        | 57.94                    | 4.17                 | 131.6                |
|                                |                                                                                 |                         |                      | 300                  | 240.76        | 64.68                    | 3.72                 | 131.4                |
| <i>combined_ncbi</i>           | <i>refseq_microbial</i> +<br><i>refseq_model_organisms</i><br>+ <i>blast_nt</i> | 41742958<br>(1130634)   | 373.873              | 75                   | 370.80        | 106.77                   | 3.47                 | 304.6                |
|                                |                                                                                 |                         |                      | 125                  | 368.74        | 114.19                   | 3.23                 | 270.4                |
|                                |                                                                                 |                         |                      | 150                  | 367.72        | 116.67                   | 3.15                 | 262.6                |
|                                |                                                                                 |                         |                      | 300                  | 361.77        | 125.23                   | 2.89                 | 257.0                |
| <i>refseq_invertebrate</i>     | Invertebrate genomes from RefSeq                                                | 2388261<br>(101)        | 39.647               | 75                   | 39.47         | 32.97                    | 1.20                 | 63.5                 |
|                                |                                                                                 |                         |                      | 125                  | 39.35         | 33.67                    | 1.17                 | 56.6                 |
|                                |                                                                                 |                         |                      | 150                  | 39.29         | 33.78                    | 1.16                 | 55.4                 |
|                                |                                                                                 |                         |                      | 300                  | 38.95         | 33.80                    | 1.15                 | 53.4                 |
| <i>refseq_plant</i>            | Plant genomes from RefSeq                                                       | 931136<br>(68)          | 33.222               | 75                   | 33.15         | 25.96                    | 1.28                 | 61.6                 |
|                                |                                                                                 |                         |                      | 125                  | 33.11         | 27.35                    | 1.21                 | 50.0                 |
|                                |                                                                                 |                         |                      | 150                  | 33.08         | 27.65                    | 1.20                 | 48.0                 |
|                                |                                                                                 |                         |                      | 300                  | 32.96         | 28.27                    | 1.17                 | 44.8                 |
