# Supplementary material for: taxMaps: comprehensive and highly accurate taxonomic classification of short-read data in reasonable time
Source: HighWire-hosted journal article supplement (doi:10.1101/gr.225276.117), 2018-03-27
Supplement: Supplemental_Fig_S2.pdf [file Supplemental_Fig_S2.pdf]

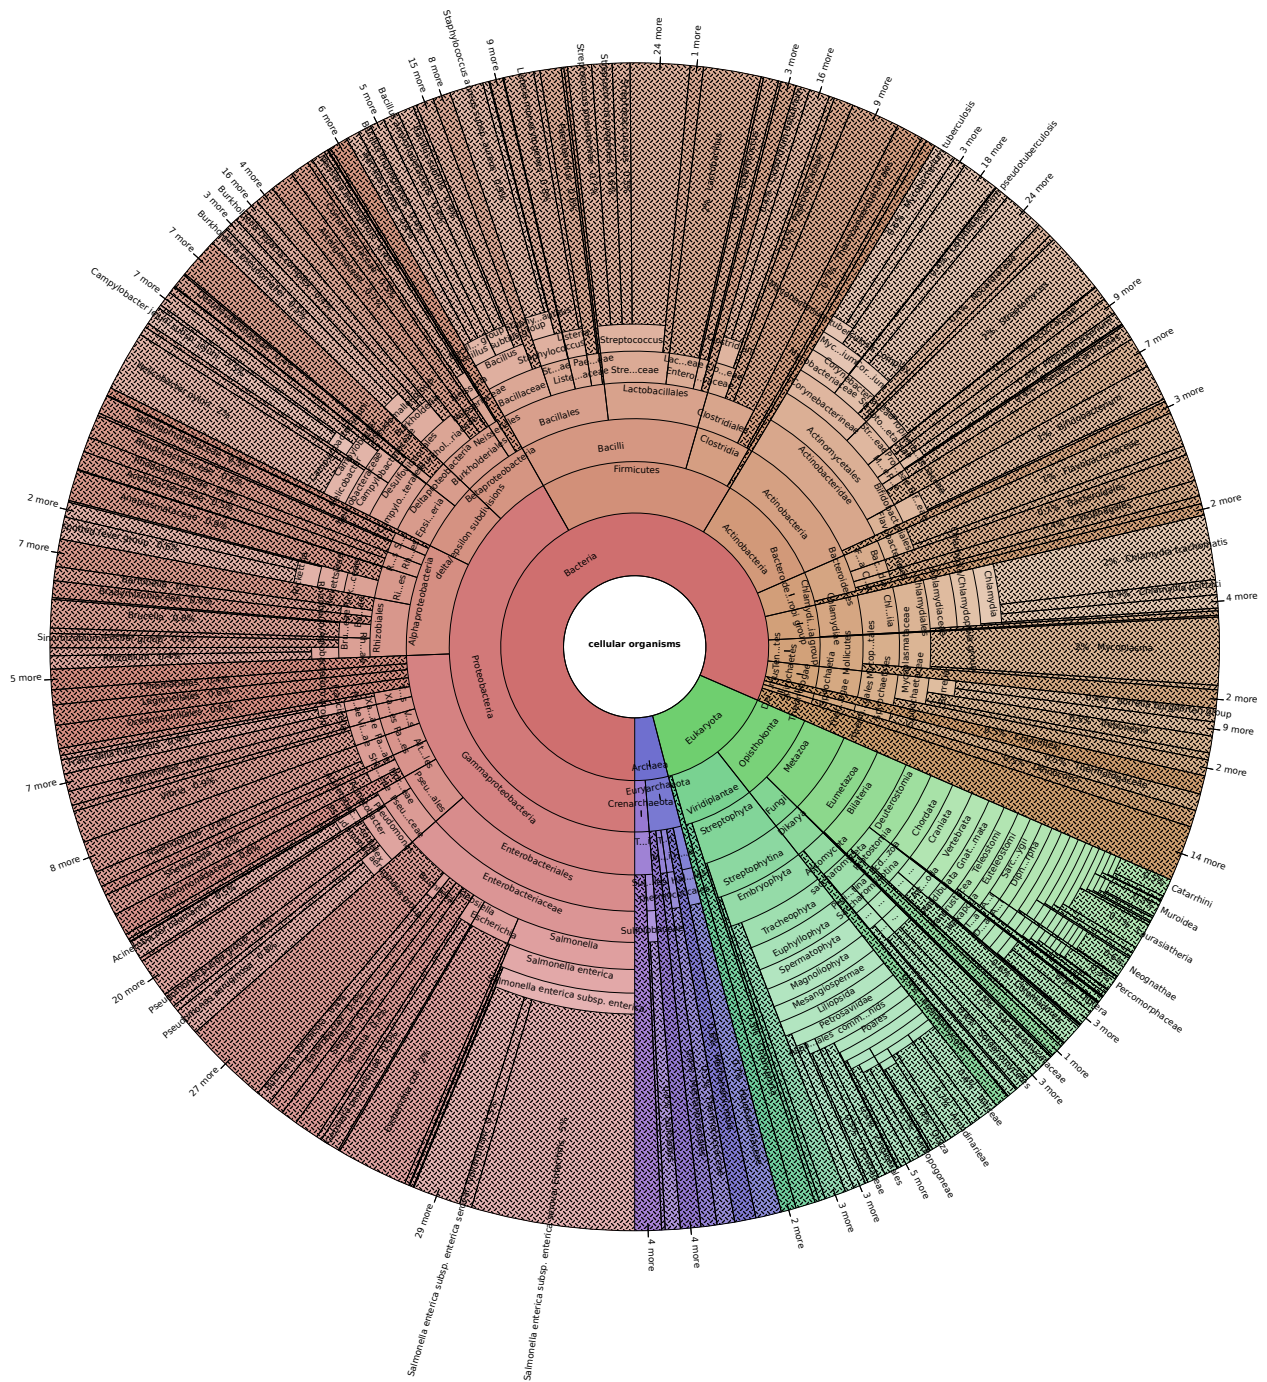

**Supplemental Figure S2 | Taxonomic distribution of the simulated paired-end datasets.** Krona visualization of the relative abundance of organisms present in the simulated benchmarking datasets. All 55 datasets share the same taxonomic composition.
