# Supplementary material for: taxMaps: comprehensive and highly accurate taxonomic classification of short-read data in reasonable time
Source: HighWire-hosted journal article supplement (doi:10.1101/gr.225276.117), 2018-03-27
Supplement: Supplemental_Table_S3.xlsx [file Supplemental_Table_S3.xlsx]

## Sheet: Sheet1
Supplemental Table S3 | Classification F-score on the simulated metagenomics single-end and paired-end datasets.
				Paired-end Classification F-score									Single-end Classification F-score
Edit Distance (%)	Read Length (nt)	Program		Species	Genus	Family	Order	Class	Phylum	Kingdom	Root		Species	Genus	Family	Order	Class	Phylum	Kingdom	Root
0	75	BLASTN		0.93835	0.976123	0.987557	0.988504	0.990332	0.990974	0.992225	0.999725		0.913572	0.964069	0.978411	0.980037	0.982753	0.984109	0.985945	0.997308
		Centrifuge		0.916216	0.955527	0.969539	0.970395	0.973049	0.973613	0.974387	0.979495		0.884682	0.93713	0.954997	0.956882	0.96082	0.962056	0.963499	0.973256
		Kraken		0.931177	0.970785	0.986556	0.987773	0.990806	0.991673	0.992867	1		0.907669	0.959773	0.978262	0.980398	0.985005	0.98709	0.988936	1
		MegaBLAST		0.932202	0.971278	0.986582	0.987616	0.990377	0.991096	0.992303	0.999382		0.904485	0.955495	0.973829	0.975719	0.979743	0.981404	0.983247	0.994154
		taxMaps		0.933482	0.972205	0.987359	0.988364	0.991097	0.991773	0.992944	1		0.910685	0.961617	0.979824	0.981699	0.985677	0.987262	0.98905	1
	125	BLASTN		0.950462	0.981437	0.990312	0.990715	0.99221	0.992641	0.993635	0.999895		0.931647	0.972692	0.984609	0.985505	0.987475	0.988256	0.989713	0.999182
		Centrifuge		0.934823	0.96677	0.977906	0.978372	0.980666	0.981046	0.981683	0.986223		0.906577	0.949537	0.96501	0.966135	0.968973	0.969676	0.970817	0.978959
		Kraken		0.942674	0.975942	0.989238	0.989967	0.992473	0.993006	0.994027	1		0.923237	0.966547	0.983207	0.984676	0.988156	0.989337	0.990858	1
		MegaBLAST		0.945515	0.977561	0.989623	0.990143	0.992414	0.992838	0.99384	0.999696		0.924884	0.966624	0.982298	0.983414	0.986295	0.987139	0.988622	0.997611
		taxMaps		0.946027	0.977935	0.989956	0.990473	0.99274	0.993161	0.994146	1		0.927445	0.969132	0.984744	0.985855	0.988722	0.989557	0.99101	1
	150	BLASTN		0.95421	0.983063	0.99104	0.991361	0.992783	0.993164	0.9941	0.99991		0.936945	0.97504	0.986004	0.986734	0.988563	0.98923	0.990567	0.999412
		Centrifuge		0.941383	0.970905	0.981063	0.981441	0.98365	0.983992	0.984587	0.988935		0.914281	0.954205	0.96861	0.969526	0.97215	0.972747	0.973787	0.981372
		Kraken		0.946399	0.977624	0.990008	0.990615	0.993	0.993468	0.994439	1		0.928163	0.968758	0.984634	0.985906	0.989084	0.990059	0.991478	1
		MegaBLAST		0.949693	0.97947	0.990428	0.990842	0.993026	0.993398	0.994345	0.99977		0.931017	0.969877	0.984443	0.985358	0.988015	0.988699	0.990068	0.998427
		taxMaps		0.950042	0.979735	0.990672	0.991085	0.993267	0.993638	0.994572	1		0.932713	0.971527	0.986052	0.986964	0.989613	0.990294	0.991643	1
	250	BLASTN		0.963295	0.986798	0.99258	0.992793	0.994131	0.994429	0.995278	0.999975		0.949938	0.980741	0.989123	0.989542	0.991127	0.991557	0.992644	0.999752
		Centrifuge		0.956684	0.980247	0.98798	0.988195	0.99024	0.990515	0.991012	0.994877		0.93523	0.967386	0.978721	0.979222	0.981497	0.981911	0.982697	0.988739
		Kraken		0.955703	0.981786	0.991759	0.992119	0.99428	0.994627	0.995498	1		0.94068	0.974569	0.987984	0.988761	0.991367	0.991976	0.993141	1
		MegaBLAST		0.959831	0.98392	0.992174	0.992398	0.99444	0.994723	0.995556	0.99989		0.945378	0.977014	0.988468	0.988962	0.991246	0.991664	0.992766	0.999434
		taxMaps		0.959961	0.984034	0.992287	0.992511	0.994552	0.994836	0.99566	1		0.945991	0.977604	0.989046	0.989539	0.991821	0.992239	0.993331	1
	300	BLASTN		0.964953	0.987337	0.992809	0.993006	0.994298	0.994586	0.995409	0.999965		0.954109	0.982463	0.990078	0.990424	0.991923	0.992291	0.993293	0.99982
		Centrifuge		0.959267	0.981831	0.989185	0.989374	0.991396	0.991656	0.992139	0.995911		0.941983	0.971625	0.981968	0.982361	0.98455	0.984919	0.985626	0.991126
		Kraken		0.957296	0.98249	0.992019	0.992344	0.994472	0.994803	0.995658	1		0.94481	0.976528	0.989025	0.989659	0.992127	0.992642	0.993727	1
		MegaBLAST		0.961752	0.984721	0.992446	0.99264	0.994664	0.994934	0.995742	0.999906		0.949863	0.979145	0.989568	0.989952	0.992149	0.99251	0.993529	0.999603
		taxMaps		0.961858	0.984818	0.992541	0.992735	0.994759	0.995029	0.995831	1		0.950293	0.979557	0.989973	0.990356	0.992552	0.992912	0.993924	1
2	75	BLASTN		0.93629	0.974978	0.987281	0.988315	0.990249	0.991033	0.992373	0.99982		0.912491	0.963214	0.978308	0.980052	0.982934	0.984392	0.986327	0.997717
		Centrifuge		0.903499	0.949201	0.967205	0.968866	0.97268	0.974549	0.975724	0.98126		0.851071	0.910924	0.931548	0.934391	0.940247	0.943394	0.945779	0.956717
		Kraken		0.913516	0.960256	0.978968	0.980897	0.98542	0.987532	0.989132	0.997195		0.854156	0.913288	0.93403	0.936974	0.943321	0.947081	0.949465	0.961284
		MegaBLAST		0.925881	0.96692	0.983293	0.984589	0.987921	0.989109	0.9905	0.99786		0.879108	0.930987	0.949956	0.95203	0.956507	0.958538	0.960506	0.971366
		taxMaps		0.930163	0.970449	0.986459	0.987643	0.990735	0.991704	0.992973	1		0.907499	0.959964	0.978876	0.980919	0.985291	0.987159	0.989048	0.999868
	125	BLASTN		0.94948	0.980732	0.990187	0.990696	0.992288	0.992729	0.993797	0.999925		0.93117	0.972135	0.984658	0.985682	0.987745	0.988494	0.990018	0.99937
		Centrifuge		0.92282	0.960682	0.976697	0.977763	0.980395	0.981662	0.982511	0.986919		0.895075	0.942947	0.961269	0.963022	0.966953	0.968878	0.970374	0.978524
		Kraken		0.931851	0.970177	0.986557	0.987743	0.991166	0.992429	0.993682	0.999976		0.906434	0.956082	0.975373	0.977554	0.982522	0.985019	0.986934	0.996614
		MegaBLAST		0.943572	0.976368	0.989067	0.989656	0.992095	0.992634	0.993706	0.999548		0.920681	0.963028	0.979187	0.980379	0.983433	0.98439	0.98593	0.994875
		taxMaps		0.942328	0.976368	0.989449	0.99015	0.992681	0.99325	0.994307	1		0.924086	0.967663	0.984138	0.985451	0.988641	0.98963	0.991154	0.999996
	150	BLASTN		0.953513	0.982457	0.990966	0.991398	0.992947	0.993321	0.994308	0.999955		0.936374	0.974429	0.986029	0.986886	0.988804	0.989419	0.990825	0.999555
		Centrifuge		0.928808	0.964309	0.979683	0.980592	0.982879	0.984013	0.984802	0.988835		0.904549	0.94867	0.966074	0.967505	0.970868	0.972522	0.97382	0.981032
		Kraken		0.936286	0.972282	0.98778	0.988772	0.991942	0.993042	0.994211	0.999998		0.914833	0.961149	0.97976	0.981665	0.986164	0.988284	0.990051	0.998978
		MegaBLAST		0.948145	0.978582	0.990085	0.990544	0.992833	0.993277	0.994289	0.999693		0.928584	0.967994	0.982976	0.983946	0.986722	0.987484	0.988909	0.997229
		taxMaps		0.945888	0.978069	0.990183	0.990803	0.993236	0.993724	0.994724	1		0.928995	0.969958	0.985434	0.986573	0.98954	0.990352	0.991774	0.999997
	250	BLASTN		0.963078	0.986438	0.992749	0.992957	0.994389	0.994682	0.99548	0.999975		0.949425	0.980363	0.98924	0.989684	0.991316	0.991728	0.992829	0.999805
		Centrifuge		0.943713	0.973393	0.986564	0.987116	0.988813	0.989637	0.990318	0.993627		0.92655	0.961657	0.976426	0.977246	0.979552	0.980745	0.981677	0.986676
		Kraken		0.946707	0.977216	0.990397	0.990986	0.993694	0.994455	0.995461	1		0.930578	0.969068	0.985512	0.986743	0.990238	0.991594	0.992997	0.999993
		MegaBLAST		0.958739	0.98336	0.992056	0.992299	0.994376	0.994679	0.995553	0.999855		0.944322	0.976433	0.988226	0.988752	0.991075	0.991517	0.992653	0.999283
		taxMaps		0.955704	0.982247	0.991832	0.992272	0.994487	0.994837	0.995714	1		0.942213	0.97597	0.988522	0.989252	0.991767	0.992259	0.99341	0.999999
	300	BLASTN		0.965004	0.987161	0.993058	0.99326	0.994672	0.994935	0.995671	0.99999		0.953853	0.982253	0.990249	0.990626	0.992218	0.992563	0.993556	0.999877
		Centrifuge		0.947191	0.975412	0.98793	0.988408	0.990037	0.990801	0.991452	0.99461		0.933262	0.965608	0.979458	0.980127	0.982213	0.983292	0.984135	0.988554
		Kraken		0.948623	0.978104	0.990838	0.991368	0.994	0.994714	0.995695	1		0.935175	0.971333	0.986929	0.987953	0.991184	0.992362	0.993655	0.999999
		MegaBLAST		0.960806	0.984252	0.992357	0.99257	0.994618	0.9949	0.995749	0.999878		0.948946	0.978693	0.989412	0.989824	0.992052	0.992429	0.993479	0.999517
		taxMaps		0.957926	0.98314	0.992146	0.992551	0.994721	0.99504	0.995892	1		0.946689	0.977988	0.989499	0.990108	0.992508	0.992924	0.993992	1
4	75	BLASTN		0.93373	0.973551	0.986069	0.98715	0.989368	0.990407	0.992044	0.999835		0.910414	0.962446	0.977704	0.979447	0.982607	0.984282	0.986512	0.998119
		Centrifuge		0.868225	0.923269	0.944778	0.947643	0.953427	0.957155	0.959567	0.967597		0.757559	0.824005	0.847194	0.851209	0.858904	0.864201	0.868538	0.88255
		Kraken		0.863684	0.918595	0.93958	0.942413	0.948681	0.95226	0.954406	0.964119		0.734978	0.796529	0.818113	0.821591	0.828916	0.833727	0.836448	0.848658
		MegaBLAST		0.898829	0.943958	0.961949	0.963795	0.968138	0.9702	0.971946	0.980215		0.797571	0.849707	0.86941	0.871804	0.876911	0.87955	0.881707	0.892512
		taxMaps		0.927363	0.968925	0.985643	0.987006	0.99045	0.991631	0.992962	0.99999		0.902937	0.956608	0.976124	0.978327	0.983075	0.985176	0.987142	0.99791
	125	BLASTN		0.947693	0.980288	0.989696	0.990291	0.991933	0.992602	0.993858	0.99993		0.9295	0.971742	0.984349	0.985419	0.987485	0.988453	0.990162	0.999462
		Centrifuge		0.907987	0.952846	0.972348	0.974157	0.978114	0.980511	0.981813	0.987146		0.857776	0.914262	0.935816	0.938722	0.944707	0.948584	0.951411	0.961758
		Kraken		0.914516	0.959965	0.979129	0.981059	0.985827	0.98812	0.98967	0.99707		0.855709	0.912497	0.933829	0.936804	0.943373	0.947326	0.949682	0.960429
		MegaBLAST		0.938096	0.972674	0.986411	0.987235	0.990056	0.990926	0.99214	0.998201		0.897172	0.940429	0.957368	0.95876	0.962179	0.963439	0.9651	0.974058
		taxMaps		0.94074	0.975545	0.989211	0.98999	0.992621	0.993269	0.994356	1		0.922488	0.96682	0.983786	0.985187	0.98851	0.989588	0.991148	0.99994
	150	BLASTN		0.951743	0.981902	0.9905	0.990973	0.992522	0.993074	0.994243	0.99993		0.935034	0.974227	0.985843	0.986723	0.98863	0.989428	0.990964	0.99961
		Centrifuge		0.915389	0.957542	0.976407	0.977951	0.981378	0.983445	0.984568	0.989343		0.876923	0.929124	0.949919	0.952395	0.957609	0.960947	0.963182	0.971914
		Kraken		0.92241	0.964816	0.983199	0.984843	0.989133	0.991068	0.992463	0.999164		0.87982	0.933657	0.954544	0.957258	0.963389	0.966893	0.96906	0.979093
		MegaBLAST		0.944855	0.976546	0.988884	0.989489	0.992015	0.99265	0.993753	0.999235		0.915591	0.955839	0.971511	0.97262	0.975635	0.976581	0.978089	0.986408
		taxMaps		0.944494	0.977379	0.990036	0.990704	0.993203	0.993749	0.99478	1		0.927615	0.969275	0.985229	0.986429	0.989488	0.990359	0.991813	0.999992
	250	BLASTN		0.962166	0.986341	0.992648	0.992907	0.994293	0.994657	0.995535	0.99998		0.948897	0.980485	0.989302	0.989771	0.99137	0.991873	0.993058	0.999855
		Centrifuge		0.93196	0.967686	0.984401	0.985351	0.987785	0.98919	0.990072	0.994039		0.912212	0.953818	0.972286	0.973764	0.977207	0.979422	0.980719	0.986355
		Kraken		0.936193	0.971966	0.988132	0.989149	0.992521	0.993756	0.994862	0.999994		0.915635	0.96063	0.979774	0.981693	0.986432	0.988736	0.990378	0.998271
		MegaBLAST		0.957436	0.982705	0.991886	0.992165	0.994304	0.994637	0.995548	0.999802		0.942165	0.974872	0.987093	0.987653	0.990043	0.990519	0.991692	0.998288
		taxMaps		0.954925	0.981915	0.991814	0.992249	0.994478	0.994836	0.995754	1		0.941433	0.975643	0.988486	0.989217	0.991746	0.992253	0.99344	0.999999
	300	BLASTN		0.963966	0.987058	0.992882	0.99312	0.994506	0.994839	0.995692	0.99998		0.95294	0.982196	0.990151	0.990561	0.992097	0.992521	0.993645	0.999895
		Centrifuge		0.935996	0.97006	0.986013	0.986828	0.989093	0.990387	0.991229	0.995055		0.920397	0.958843	0.976375	0.977587	0.980613	0.982561	0.983688	0.988679
		Kraken		0.938556	0.973109	0.988794	0.989709	0.99295	0.994088	0.995161	0.999998		0.922409	0.964568	0.982956	0.9846	0.988912	0.990881	0.992368	0.999498
		MegaBLAST		0.959649	0.983704	0.992252	0.992484	0.994568	0.99487	0.995752	0.999833		0.947527	0.97783	0.988934	0.989365	0.991632	0.99203	0.993116	0.999126
		taxMaps		0.957346	0.98293	0.99216	0.992534	0.994701	0.995027	0.995924	1		0.946112	0.977782	0.989498	0.990083	0.992474	0.992903	0.994011	0.999999
6	75	BLASTN		0.932197	0.972348	0.985406	0.986405	0.988905	0.99006	0.991704	0.999895		0.909128	0.961648	0.97731	0.979066	0.982433	0.984219	0.986514	0.998505
		Centrifuge		0.787493	0.851318	0.875658	0.879894	0.887876	0.89397	0.898985	0.912427		0.623563	0.690891	0.714905	0.71966	0.728462	0.735458	0.741967	0.759868
		Kraken		0.760708	0.820355	0.842683	0.846174	0.85366	0.858592	0.861228	0.872225		0.578946	0.636833	0.657411	0.660925	0.668333	0.673526	0.676302	0.688036
		MegaBLAST		0.831102	0.879888	0.899493	0.901957	0.907447	0.910494	0.912651	0.921896		0.672078	0.722143	0.741727	0.744362	0.749966	0.753136	0.755412	0.765914
		taxMaps		0.923268	0.966546	0.984063	0.985663	0.989582	0.991142	0.99255	0.999691		0.890245	0.945184	0.965403	0.96781	0.973026	0.975522	0.977566	0.988354
	125	BLASTN		0.946396	0.979198	0.989202	0.989757	0.991634	0.992166	0.993423	0.999955		0.928561	0.971038	0.983965	0.98507	0.987412	0.988258	0.989982	0.999617
		Centrifuge		0.875655	0.929383	0.952019	0.954961	0.961032	0.965271	0.968067	0.976565		0.774914	0.839376	0.863612	0.8678	0.875953	0.882154	0.887579	0.903107
		Kraken		0.871698	0.925163	0.94682	0.949659	0.956165	0.959929	0.962038	0.971098		0.752072	0.812606	0.835027	0.838561	0.846272	0.85135	0.854092	0.865681
		MegaBLAST		0.917913	0.955714	0.971178	0.972468	0.976128	0.977693	0.97922	0.985987		0.830852	0.874808	0.892726	0.894458	0.898563	0.900407	0.902272	0.911314
		taxMaps		0.939697	0.974812	0.988872	0.989693	0.992462	0.993231	0.994344	0.999997		0.920398	0.965066	0.982387	0.983833	0.987308	0.988508	0.990105	0.998895
	150	BLASTN		0.950894	0.981262	0.990297	0.990714	0.992425	0.992897	0.994066	0.99997		0.934262	0.973611	0.985541	0.986403	0.988493	0.989212	0.990801	0.999685
		Centrifuge		0.890271	0.940564	0.962531	0.965052	0.970411	0.974024	0.976158	0.983233		0.808381	0.869398	0.893107	0.896862	0.904342	0.909915	0.914449	0.927898
		Kraken		0.892343	0.942746	0.963808	0.96634	0.972361	0.975623	0.977507	0.985758		0.797389	0.856784	0.879267	0.882669	0.890197	0.895007	0.897619	0.908768
		MegaBLAST		0.932941	0.967195	0.981008	0.981987	0.985181	0.986343	0.987679	0.993685		0.868907	0.910053	0.926733	0.928146	0.931768	0.93319	0.934875	0.9433
		taxMaps		0.944045	0.976906	0.98986	0.990534	0.993091	0.993705	0.994758	1		0.926926	0.968639	0.984845	0.986052	0.989178	0.990123	0.991607	0.999787
	250	BLASTN		0.96128	0.98598	0.992471	0.992729	0.994172	0.99443	0.995384	0.99998		0.948067	0.980033	0.989043	0.989512	0.991259	0.991602	0.99283	0.99988
		Centrifuge		0.916959	0.959374	0.979349	0.980939	0.984672	0.987013	0.988233	0.993116		0.880199	0.93087	0.952762	0.955348	0.960902	0.964834	0.967378	0.975823
		Kraken		0.921758	0.964031	0.983033	0.984732	0.989372	0.991469	0.992891	0.999133		0.880073	0.93287	0.954428	0.957174	0.963641	0.96731	0.969424	0.978715
		MegaBLAST		0.954648	0.980974	0.990889	0.991299	0.993641	0.994129	0.99511	0.99946		0.931018	0.964452	0.977299	0.977991	0.980592	0.981224	0.982483	0.989122
		taxMaps		0.955111	0.981887	0.991865	0.992242	0.994456	0.994836	0.995762	1		0.941588	0.97564	0.988531	0.989208	0.991703	0.992229	0.993442	0.999997
	300	BLASTN		0.963276	0.98677	0.992897	0.993119	0.994506	0.994758	0.995652	0.999985		0.952293	0.981934	0.990132	0.990504	0.99213	0.992442	0.993577	0.999922
		Centrifuge		0.921834	0.962327	0.981706	0.983102	0.986532	0.988666	0.989781	0.99441		0.895805	0.942767	0.963848	0.966043	0.970932	0.974338	0.976316	0.983346
		Kraken		0.925489	0.966132	0.984625	0.986167	0.990543	0.992442	0.993797	0.999659		0.896591	0.946434	0.967392	0.969848	0.975835	0.97904	0.980958	0.98947
		MegaBLAST		0.957812	0.982614	0.991718	0.992027	0.994243	0.99462	0.99554	0.999646		0.941814	0.972726	0.984316	0.984832	0.987236	0.987715	0.988852	0.994878
		taxMaps		0.957598	0.982953	0.992204	0.992523	0.994679	0.99502	0.995921	1		0.946339	0.977833	0.98955	0.990085	0.992444	0.992887	0.994013	0.999999
8	75	BLASTN		0.928533	0.970488	0.984001	0.985249	0.987844	0.989149	0.99113	0.999885		0.905497	0.959443	0.975689	0.977667	0.981222	0.983296	0.985871	0.998728
		Centrifuge		0.665492	0.733544	0.759216	0.764504	0.774004	0.782175	0.790587	0.811191		0.47786	0.539673	0.562251	0.567199	0.576021	0.58383	0.592208	0.613258
		Kraken		0.614951	0.673927	0.695519	0.699298	0.707171	0.712696	0.715609	0.726899		0.419496	0.468486	0.486005	0.489195	0.49582	0.500627	0.503166	0.513311
		MegaBLAST		0.719742	0.769778	0.79008	0.79304	0.799265	0.80314	0.805619	0.815339		0.526876	0.571979	0.590061	0.592712	0.598237	0.601639	0.60389	0.613379
		taxMaps		0.915064	0.961195	0.979794	0.981689	0.986307	0.98837	0.989886	0.997305		0.861505	0.91803	0.939207	0.941831	0.947645	0.950611	0.952746	0.963558
	125	BLASTN		0.945371	0.979156	0.989611	0.990202	0.99202	0.992659	0.993964	0.99996		0.927518	0.970851	0.984272	0.985363	0.987719	0.988719	0.990439	0.999657
		Centrifuge		0.806004	0.868971	0.894345	0.898708	0.907055	0.913863	0.920022	0.935651		0.653378	0.721305	0.746692	0.751843	0.761402	0.769665	0.778325	0.800407
		Kraken		0.781431	0.840941	0.863897	0.867496	0.875342	0.880454	0.883167	0.893638		0.607514	0.666516	0.688054	0.691775	0.699697	0.705295	0.708224	0.719705
		MegaBLAST		0.86399	0.905349	0.922743	0.924691	0.929354	0.931825	0.933774	0.941359		0.719537	0.762955	0.781327	0.783439	0.788128	0.790604	0.79268	0.801548
		taxMaps		0.937256	0.973478	0.988211	0.989113	0.992139	0.993072	0.994194	0.999888		0.912342	0.957917	0.97589	0.977414	0.981159	0.982532	0.984142	0.992946
	150	BLASTN		0.949996	0.981167	0.990629	0.991112	0.992801	0.993312	0.99449	0.99997		0.933258	0.973426	0.98588	0.986805	0.988914	0.989741	0.99131	0.999772
		Centrifuge		0.833129	0.89279	0.917535	0.921436	0.929105	0.935102	0.940104	0.953313		0.69617	0.762462	0.787647	0.792549	0.801756	0.809538	0.817437	0.837999
		Kraken		0.82255	0.880333	0.903156	0.906563	0.914069	0.918792	0.921316	0.931197		0.667267	0.727667	0.750013	0.753781	0.761876	0.767475	0.770405	0.781916
		MegaBLAST		0.895802	0.933585	0.949373	0.950959	0.955107	0.957127	0.958859	0.965643		0.775923	0.817417	0.834989	0.836824	0.841116	0.843227	0.845148	0.853543
		taxMaps		0.943006	0.976209	0.989582	0.990269	0.992946	0.993655	0.994709	0.999988		0.923987	0.966053	0.982667	0.983898	0.987149	0.988188	0.989678	0.997884
	250	BLASTN		0.96017	0.985883	0.992756	0.993009	0.994425	0.994794	0.995767	0.99998		0.946796	0.979822	0.989438	0.989965	0.991601	0.992115	0.993327	0.999897
		Centrifuge		0.890861	0.941386	0.964495	0.96712	0.972696	0.97665	0.979119	0.986835		0.811534	0.871712	0.896466	0.900449	0.908342	0.914651	0.920287	0.935501
		Kraken		0.89285	0.943309	0.964878	0.967506	0.973691	0.977072	0.978995	0.986903		0.800962	0.860148	0.883199	0.886714	0.894508	0.899529	0.902197	0.912781
		MegaBLAST		0.944731	0.973322	0.984628	0.985411	0.988359	0.989362	0.990577	0.995336		0.889976	0.924579	0.938573	0.939599	0.942784	0.94391	0.94536	0.952108
		taxMaps		0.954936	0.981671	0.99186	0.992218	0.994461	0.994867	0.995791	1		0.941241	0.975337	0.988448	0.989097	0.991621	0.992177	0.993385	0.99994
	300	BLASTN		0.962577	0.986785	0.993106	0.993333	0.994739	0.995031	0.995944	0.999985		0.951518	0.981899	0.990434	0.990861	0.992458	0.992864	0.993967	0.999915
		Centrifuge		0.899733	0.947996	0.970596	0.972925	0.978018	0.98155	0.983574	0.990326		0.841624	0.898558	0.92276	0.926313	0.933494	0.939117	0.943726	0.95655
		Kraken		0.902391	0.950851	0.971976	0.974401	0.980255	0.983326	0.985108	0.992524		0.835189	0.892466	0.915352	0.91867	0.926146	0.930776	0.933266	0.943259
		MegaBLAST		0.951445	0.977879	0.988037	0.988621	0.991275	0.992018	0.993103	0.997439		0.915288	0.947264	0.959821	0.960596	0.963439	0.964272	0.965562	0.971675
		taxMaps		0.957398	0.982767	0.992224	0.992522	0.994688	0.995043	0.995946	1		0.946071	0.977619	0.989532	0.990041	0.992415	0.992877	0.994005	0.999986
10	75	BLASTN		0.921401	0.964614	0.978468	0.979967	0.983011	0.984769	0.987381	0.999925		0.89818	0.95354	0.969898	0.972101	0.976134	0.978619	0.982023	0.998951
		Centrifuge		0.521637	0.58671	0.611565	0.61746	0.627475	0.637083	0.648613	0.67618		0.342428	0.39349	0.412771	0.417467	0.425433	0.433165	0.442599	0.465466
		Kraken		0.452354	0.503652	0.522672	0.526279	0.53351	0.538982	0.54179	0.552088		0.279932	0.316651	0.330115	0.332716	0.337934	0.341949	0.344036	0.351904
		MegaBLAST		0.577192	0.624247	0.643871	0.647051	0.653535	0.657882	0.660462	0.670008		0.383706	0.420674	0.436015	0.438475	0.443442	0.44672	0.448739	0.456733
		taxMaps		0.897667	0.947621	0.967608	0.969919	0.975381	0.97813	0.979794	0.987673		0.811611	0.869424	0.891553	0.894463	0.900903	0.904423	0.906638	0.917431
	125	BLASTN		0.943444	0.978141	0.988918	0.989611	0.991776	0.992365	0.993474	0.999965		0.925529	0.969848	0.983435	0.984696	0.987335	0.988289	0.989972	0.999757
		Centrifuge		0.693748	0.762373	0.789479	0.795305	0.805633	0.815163	0.826077	0.852399		0.512219	0.576745	0.601282	0.606951	0.616953	0.626532	0.638181	0.66656
		Kraken		0.642313	0.702166	0.724953	0.729051	0.737451	0.743537	0.746567	0.757696		0.447052	0.498092	0.516977	0.520524	0.527746	0.533197	0.535959	0.546281
		MegaBLAST		0.763957	0.80719	0.826052	0.828621	0.834237	0.837708	0.840027	0.848298		0.577081	0.617137	0.634807	0.637142	0.642138	0.645133	0.647273	0.655599
		taxMaps		0.931335	0.969973	0.985786	0.986914	0.990417	0.99169	0.99286	0.998636		0.890364	0.937596	0.956537	0.958254	0.962452	0.964164	0.965819	0.974605
	150	BLASTN		0.948209	0.980591	0.990472	0.990975	0.992867	0.993383	0.994324	0.99997		0.931781	0.972859	0.985537	0.986521	0.988779	0.989579	0.991011	0.99983
		Centrifuge		0.730782	0.79758	0.824248	0.829751	0.839668	0.848504	0.858356	0.882411		0.555492	0.620647	0.645393	0.651073	0.661133	0.670577	0.682042	0.710285
		Kraken		0.699995	0.7606	0.783994	0.788091	0.796567	0.802585	0.805559	0.816535		0.508392	0.563202	0.583603	0.587389	0.595128	0.600915	0.603837	0.614702
		MegaBLAST		0.814963	0.85563	0.87329	0.875549	0.880748	0.883841	0.886004	0.893609		0.642857	0.682503	0.700083	0.702258	0.707092	0.709888	0.71198	0.72011
		taxMaps		0.940139	0.974553	0.988675	0.989482	0.992443	0.993376	0.994453	0.999754		0.913423	0.956393	0.973684	0.975036	0.978581	0.979853	0.98137	0.989555
	250	BLASTN		0.959297	0.985392	0.992691	0.992939	0.994492	0.99485	0.995596	0.99999		0.946343	0.979557	0.989199	0.989721	0.991522	0.991991	0.993053	0.999932
		Centrifuge		0.833295	0.893194	0.919127	0.923405	0.931594	0.938374	0.944614	0.960729		0.699596	0.765802	0.792283	0.797692	0.807683	0.816757	0.827165	0.853002
		Kraken		0.823543	0.881472	0.905023	0.908699	0.916639	0.921814	0.924338	0.934011		0.67052	0.731083	0.754204	0.758274	0.766798	0.772915	0.77594	0.787216
		MegaBLAST		0.911716	0.943839	0.957087	0.95848	0.962486	0.964456	0.966052	0.97154		0.801385	0.836845	0.852092	0.853628	0.857688	0.859667	0.861404	0.868288
		taxMaps		0.953887	0.981056	0.991664	0.992038	0.994366	0.994859	0.995799	0.999998		0.939493	0.973999	0.9875	0.988182	0.990794	0.99144	0.992671	0.999215
	300	BLASTN		0.961393	0.986072	0.992939	0.993172	0.994628	0.994976	0.995712	1		0.950638	0.981341	0.990165	0.990594	0.992256	0.992671	0.993643	0.999957
		Centrifuge		0.851905	0.909466	0.934975	0.938852	0.946486	0.952629	0.957853	0.971762		0.743462	0.808301	0.834684	0.839836	0.849462	0.858044	0.867404	0.890871
		Kraken		0.84564	0.902086	0.925389	0.928898	0.936576	0.941444	0.943809	0.953035		0.721	0.78186	0.805425	0.809469	0.818005	0.824007	0.826961	0.838021
		MegaBLAST		0.927367	0.956813	0.968681	0.969827	0.973453	0.975065	0.976479	0.981367		0.845385	0.878619	0.892553	0.893833	0.897533	0.899169	0.900732	0.907017
		taxMaps		0.9565	0.982265	0.992098	0.992411	0.994643	0.995058	0.995964	1		0.944982	0.97693	0.989186	0.989717	0.992155	0.99268	0.993818	0.999785
12	75	BLASTN		0.906744	0.951127	0.965957	0.96783	0.971568	0.974076	0.97878	0.99993		0.882047	0.938737	0.956116	0.958698	0.963385	0.966671	0.972285	0.998934
		Centrifuge		0.381627	0.437491	0.459144	0.464866	0.474227	0.484124	0.498164	0.531233		0.232305	0.270965	0.285955	0.289954	0.296499	0.30344	0.313325	0.336763
		Kraken		0.304624	0.344025	0.35883	0.361797	0.367675	0.372273	0.374734	0.382859		0.174705	0.199623	0.208976	0.210873	0.214617	0.217576	0.21916	0.224544
		MegaBLAST		0.428445	0.46876	0.485766	0.488809	0.494776	0.498976	0.501437	0.509924		0.261866	0.289702	0.301492	0.303557	0.307594	0.310386	0.312067	0.3182
		taxMaps		0.864811	0.918659	0.94005	0.9428	0.949125	0.952591	0.954447	0.96296		0.740272	0.798344	0.820953	0.824037	0.83096	0.834947	0.83723	0.847897
	125	BLASTN		0.94063	0.976186	0.987381	0.988274	0.990485	0.991323	0.992886	0.99995		0.922739	0.967979	0.982034	0.983403	0.986087	0.987276	0.989313	0.99977
		Centrifuge		0.555719	0.623601	0.650326	0.656995	0.668137	0.679614	0.695606	0.733628		0.375844	0.431281	0.452871	0.458408	0.467678	0.47742	0.491213	0.524255
		Kraken		0.479777	0.533246	0.553521	0.557473	0.565423	0.571476	0.574638	0.584912		0.301929	0.341133	0.355866	0.3588	0.364665	0.369222	0.371624	0.379694
		MegaBLAST		0.626681	0.668716	0.687485	0.690442	0.696525	0.700564	0.703151	0.711528		0.429224	0.463213	0.478571	0.480877	0.485587	0.488615	0.490668	0.497869
		taxMaps		0.918313	0.960585	0.977788	0.979202	0.983294	0.984933	0.986162	0.992193		0.847592	0.896705	0.916741	0.918642	0.923362	0.925401	0.927099	0.935895
	150	BLASTN		0.946314	0.979252	0.989521	0.990223	0.992132	0.992796	0.99399	0.99997		0.929826	0.971659	0.984691	0.98579	0.988069	0.989055	0.990678	0.999852
		Centrifuge		0.595569	0.663468	0.690094	0.696689	0.707882	0.719121	0.734769	0.772336		0.412911	0.470453	0.492514	0.498258	0.507951	0.517959	0.532371	0.567175
		Kraken		0.542301	0.59916	0.620886	0.625027	0.633454	0.639803	0.643104	0.653761		0.354057	0.398123	0.414745	0.418001	0.424588	0.429679	0.432348	0.441274
		MegaBLAST		0.690713	0.731691	0.750084	0.752878	0.758823	0.762671	0.765208	0.773192		0.493402	0.528413	0.544398	0.546686	0.551506	0.554534	0.556657	0.563948
		taxMaps		0.933715	0.970454	0.985631	0.986636	0.99	0.991186	0.992298	0.997736		0.887515	0.93187	0.950044	0.951535	0.955472	0.956986	0.958533	0.966718
	250	BLASTN		0.95793	0.984694	0.992345	0.99269	0.994173	0.994602	0.995531	0.999985		0.94503	0.978761	0.988791	0.989419	0.991134	0.991697	0.992917	0.99994
		Centrifuge		0.732366	0.799627	0.827537	0.833489	0.844182	0.854322	0.867391	0.899053		0.560956	0.626971	0.653108	0.659382	0.670374	0.681497	0.697179	0.735048
		Kraken		0.700896	0.762127	0.786228	0.7905	0.799532	0.806015	0.809333	0.820035		0.510615	0.565942	0.587057	0.591044	0.599271	0.605502	0.608751	0.619357
		MegaBLAST		0.836098	0.871206	0.886647	0.88877	0.893993	0.897006	0.899187	0.905528		0.670522	0.705038	0.720751	0.722732	0.727506	0.7302	0.732271	0.739045
		taxMaps		0.951802	0.979937	0.991241	0.991691	0.994177	0.994791	0.99575	0.999933		0.933295	0.968637	0.982793	0.983561	0.986346	0.987126	0.988369	0.994906
	300	BLASTN		0.960216	0.985637	0.992756	0.99306	0.994476	0.99487	0.995778	0.999995		0.949346	0.980713	0.989859	0.990333	0.991944	0.992448	0.993605	0.999975
		Centrifuge		0.761863	0.827592	0.855374	0.860994	0.871256	0.880825	0.892716	0.921769		0.611023	0.678071	0.704806	0.711041	0.722075	0.733162	0.748478	0.785526
		Kraken		0.73612	0.797318	0.821692	0.825899	0.834912	0.841254	0.84449	0.854973		0.567138	0.625205	0.647535	0.651693	0.660312	0.666769	0.670129	0.681021
		MegaBLAST		0.865026	0.897548	0.911651	0.913527	0.9184	0.921078	0.923081	0.92876		0.728447	0.761714	0.776685	0.778498	0.783091	0.785548	0.787507	0.79385
		taxMaps		0.954975	0.981442	0.991844	0.992205	0.994534	0.995051	0.995974	0.999979		0.941783	0.974389	0.987193	0.987784	0.990326	0.990966	0.992116	0.998063
14	75	BLASTN		0.880953	0.926933	0.942406	0.944938	0.949781	0.953612	0.962344	0.99995		0.855752	0.913415	0.931167	0.934309	0.940013	0.944548	0.954494	0.998776
		Centrifuge		0.261964	0.305732	0.323053	0.328079	0.336069	0.345214	0.36027	0.396272		0.150182	0.177571	0.188446	0.191624	0.196655	0.202442	0.211974	0.234764
		Kraken		0.189398	0.216542	0.226919	0.229072	0.233292	0.236721	0.238524	0.244412		0.102818	0.118503	0.124485	0.125732	0.128179	0.130184	0.131246	0.134756
		MegaBLAST		0.29492	0.326372	0.339896	0.342471	0.347452	0.351114	0.353241	0.360278		0.16845	0.188018	0.196442	0.198013	0.201059	0.203276	0.204584	0.209086
		taxMaps		0.809919	0.866643	0.889135	0.892184	0.899308	0.903407	0.90541	0.914501		0.648892	0.705192	0.727479	0.730561	0.73767	0.741902	0.744133	0.754437
	125	BLASTN		0.936057	0.972379	0.983748	0.984827	0.987336	0.988501	0.99059	0.999965		0.917956	0.963896	0.978008	0.979665	0.982691	0.984209	0.98686	0.99975
		Centrifuge		0.414543	0.474778	0.498966	0.505642	0.516578	0.528858	0.548834	0.596863		0.25956	0.302893	0.320294	0.325152	0.333091	0.342148	0.356932	0.392418
		Kraken		0.325166	0.367144	0.383264	0.386488	0.393034	0.398247	0.400938	0.409591		0.188498	0.215524	0.225852	0.227947	0.232172	0.235597	0.237378	0.243237
		MegaBLAST		0.473066	0.510167	0.527352	0.530295	0.536133	0.540314	0.54289	0.550898		0.296046	0.322414	0.334716	0.336725	0.340718	0.343507	0.345293	0.351208
		taxMaps		0.89034	0.936413	0.955128	0.956822	0.961551	0.963561	0.964864	0.971338		0.778297	0.828268	0.848916	0.850921	0.856009	0.858293	0.859973	0.868684
	150	BLASTN		0.944325	0.977857	0.988046	0.988898	0.990969	0.991741	0.993165	0.99997		0.927742	0.970271	0.983211	0.98452	0.987049	0.988103	0.989997	0.99986
		Centrifuge		0.449664	0.511805	0.536236	0.543136	0.55447	0.567027	0.587714	0.637871		0.287082	0.333231	0.351246	0.356448	0.364958	0.374575	0.390594	0.429465
		Kraken		0.379767	0.426624	0.444651	0.448228	0.455522	0.461253	0.464221	0.473673		0.226479	0.258053	0.270107	0.272541	0.277463	0.281422	0.283481	0.290223
		MegaBLAST		0.538858	0.576671	0.594354	0.597305	0.60329	0.60754	0.610193	0.618191		0.349905	0.378156	0.391525	0.393619	0.397892	0.40084	0.402763	0.409003
		taxMaps		0.918056	0.957922	0.974458	0.975686	0.97954	0.980999	0.982155	0.987962		0.836394	0.88189	0.900816	0.902428	0.906733	0.908458	0.909995	0.918179
	250	BLASTN		0.957693	0.984671	0.992169	0.992554	0.994097	0.994567	0.995495	0.99999		0.944364	0.97869	0.98871	0.989351	0.991145	0.991746	0.992985	0.99996
		Centrifuge		0.597054	0.66619	0.694368	0.70157	0.713925	0.727096	0.748145	0.799641		0.418308	0.477545	0.501245	0.507672	0.518522	0.530574	0.550559	0.599151
		Kraken		0.539945	0.59762	0.620102	0.624317	0.633229	0.640033	0.643565	0.654479		0.352787	0.397427	0.414562	0.417903	0.424819	0.430301	0.433166	0.44226
		MegaBLAST		0.712338	0.748517	0.765345	0.768039	0.774058	0.778108	0.780738	0.787977		0.516172	0.547333	0.562267	0.56444	0.569309	0.572471	0.574639	0.581192
		taxMaps		0.947255	0.977353	0.989642	0.990206	0.99296	0.993716	0.994658	0.998984		0.913647	0.950336	0.965319	0.966173	0.969226	0.970136	0.971371	0.977994
	300	BLASTN		0.960161	0.985871	0.992752	0.99303	0.994441	0.99484	0.995697	0.999995		0.949131	0.980969	0.989876	0.990359	0.99199	0.992476	0.993585	0.999975
		Centrifuge		0.632643	0.701913	0.730278	0.737413	0.749742	0.762699	0.783196	0.833613		0.465338	0.527728	0.552577	0.559316	0.570717	0.583278	0.603994	0.654326
		Kraken		0.581695	0.641256	0.664573	0.668888	0.678062	0.685028	0.688626	0.699666		0.403737	0.452707	0.471543	0.475182	0.48276	0.48873	0.491842	0.501629
		MegaBLAST		0.753184	0.787461	0.803265	0.805785	0.811597	0.815409	0.817933	0.824574		0.577888	0.609101	0.623983	0.626115	0.631045	0.634159	0.636333	0.642719
		taxMaps		0.95199	0.979871	0.99106	0.991506	0.994006	0.994631	0.995527	0.999574		0.930273	0.963964	0.977474	0.978145	0.980875	0.981617	0.982754	0.988762
16	75	BLASTN		0.836733	0.88553	0.902879	0.906494	0.912674	0.918382	0.934252	0.999945		0.812025	0.871805	0.890973	0.895006	0.901881	0.908181	0.925055	0.998433
		Centrifuge		0.169884	0.200943	0.213678	0.217956	0.224446	0.232324	0.247485	0.284394		0.0933509	0.111367	0.118793	0.121304	0.125099	0.129723	0.138625	0.160196
		Kraken		0.109704	0.1265	0.133062	0.134567	0.137443	0.139783	0.141071	0.144836		0.0574996	0.0666125	0.070184	0.0710027	0.0725673	0.0738518	0.0745595	0.076646
		MegaBLAST		0.188971	0.210995	0.220683	0.222769	0.226565	0.229435	0.231102	0.236262		0.102741	0.115364	0.120932	0.122115	0.124274	0.125888	0.126838	0.129859
		taxMaps		0.728679	0.786088	0.809059	0.812306	0.819927	0.824546	0.826637	0.83604		0.542242	0.594012	0.614849	0.61778	0.624645	0.628883	0.630963	0.640422
	125	BLASTN		0.924709	0.963252	0.975904	0.977201	0.980009	0.98169	0.985071	0.999985		0.906095	0.953764	0.969003	0.970838	0.974312	0.976404	0.980494	0.999612
		Centrifuge		0.288414	0.336331	0.356172	0.362451	0.372237	0.384129	0.40668	0.461666		0.16963	0.200585	0.213487	0.217608	0.224001	0.231834	0.246692	0.282692
		Kraken		0.201051	0.229909	0.241182	0.243718	0.248601	0.252574	0.254698	0.260889		0.109875	0.126674	0.133243	0.13473	0.137596	0.139947	0.141212	0.144953
		MegaBLAST		0.327893	0.357199	0.371088	0.373774	0.378835	0.382592	0.384915	0.391576		0.190465	0.209011	0.217857	0.219506	0.222629	0.224894	0.226337	0.230664
		taxMaps		0.83492	0.883578	0.903561	0.905515	0.910736	0.913072	0.914485	0.921474		0.678461	0.726835	0.747062	0.749079	0.754194	0.756549	0.758171	0.766478
	150	BLASTN		0.937824	0.97317	0.984514	0.985403	0.987716	0.988731	0.990825	0.999985		0.921198	0.965001	0.978927	0.980318	0.98317	0.984528	0.987166	0.999882
		Centrifuge		0.315313	0.365703	0.385989	0.392634	0.403125	0.415646	0.440047	0.500081		0.188315	0.221706	0.235158	0.239661	0.246701	0.25518	0.271779	0.312449
		Kraken		0.241061	0.274658	0.287841	0.290757	0.29645	0.30105	0.303496	0.310554		0.134275	0.154463	0.162388	0.164156	0.167609	0.170424	0.17193	0.176352
		MegaBLAST		0.384992	0.41608	0.431057	0.433918	0.43935	0.443372	0.445893	0.452892		0.230155	0.250665	0.260625	0.262441	0.265906	0.26841	0.270028	0.274768
		taxMaps		0.880032	0.922672	0.940483	0.941943	0.946222	0.947931	0.949183	0.955486		0.749525	0.794479	0.81334	0.815009	0.819438	0.821246	0.822751	0.830694
	250	BLASTN		0.955523	0.983915	0.992277	0.992647	0.994205	0.994765	0.995712	0.999995		0.942548	0.977838	0.98853	0.989198	0.99107	0.991778	0.993065	0.999977
		Centrifuge		0.449934	0.512724	0.538708	0.546646	0.559337	0.574411	0.603136	0.674375		0.291232	0.338389	0.357881	0.364051	0.373805	0.385617	0.408484	0.464494
		Kraken		0.372301	0.419084	0.437509	0.441447	0.44928	0.455603	0.458874	0.468255		0.221618	0.252927	0.265196	0.26788	0.273179	0.2775	0.279769	0.286398
		MegaBLAST		0.555955	0.589373	0.605608	0.6087	0.614914	0.619421	0.622311	0.62949		0.364713	0.389732	0.402113	0.4043	0.408721	0.411813	0.413903	0.419451
		taxMaps		0.933831	0.966413	0.979854	0.98055	0.983514	0.984416	0.985393	0.990048		0.860077	0.897567	0.913005	0.913932	0.917095	0.918088	0.919314	0.925886
	300	BLASTN		0.958134	0.98511	0.992869	0.993218	0.994654	0.995107	0.995969	0.999995		0.947479	0.980221	0.989927	0.990433	0.992119	0.992692	0.993833	0.99999
		Centrifuge		0.484853	0.549379	0.576097	0.58418	0.597201	0.612649	0.641951	0.715506		0.329509	0.380766	0.401755	0.408416	0.41899	0.431751	0.456408	0.517214
		Kraken		0.411116	0.461054	0.480786	0.484959	0.493291	0.500023	0.503458	0.513333		0.259897	0.295567	0.309568	0.31262	0.318629	0.323532	0.326087	0.333537
		MegaBLAST		0.601629	0.634163	0.649946	0.652993	0.659287	0.663798	0.666707	0.673573		0.419838	0.445887	0.458798	0.461075	0.465791	0.469054	0.47127	0.47692
		taxMaps		0.942528	0.972282	0.984385	0.984919	0.9876	0.988337	0.98925	0.99349		0.890042	0.924554	0.938522	0.939252	0.942099	0.942913	0.944047	0.950022
18	75	BLASTN		0.771954	0.822746	0.84112	0.845803	0.85388	0.862972	0.890406	0.99997		0.75263	0.812503	0.832354	0.837269	0.845612	0.854649	0.881591	0.997823
		Centrifuge		0.10582	0.126667	0.135502	0.138898	0.143676	0.15017	0.164891	0.201006		0.0564236	0.0679136	0.0728132	0.074715	0.0773659	0.0809719	0.0891678	0.10921
		Kraken		0.0604751	0.0701541	0.0740379	0.0750222	0.0767237	0.078217	0.0790393	0.0812366		0.0310249	0.0360816	0.0381124	0.0386287	0.0395212	0.040305	0.0407364	0.0418994
		MegaBLAST		0.114259	0.128632	0.135135	0.13661	0.139228	0.141301	0.14252	0.146158		0.0600902	0.067885	0.0714166	0.0722106	0.0736223	0.0747341	0.0753932	0.077383
		taxMaps		0.622108	0.67702	0.699273	0.702495	0.710116	0.714828	0.71692	0.726131		0.427904	0.472522	0.490741	0.49334	0.499501	0.503352	0.505197	0.513372
	125	BLASTN		0.904088	0.94483	0.958653	0.9605	0.964134	0.966768	0.973029	0.999995		0.884674	0.933952	0.95018	0.952542	0.95677	0.959849	0.966948	0.999079
		Centrifuge		0.189334	0.224312	0.239356	0.244808	0.252685	0.263302	0.286683	0.345311		0.10631	0.127168	0.136204	0.13951	0.144238	0.150668	0.164855	0.200116
		Kraken		0.115825	0.133682	0.140811	0.142564	0.145701	0.148423	0.149878	0.153848		0.0608978	0.0706265	0.0745199	0.0754835	0.077196	0.078695	0.0794955	0.0817112
		MegaBLAST		0.210829	0.231616	0.241786	0.243953	0.247783	0.250791	0.252662	0.257924		0.11587	0.127936	0.133842	0.135074	0.137252	0.138943	0.140015	0.143101
		taxMaps		0.737767	0.7864	0.80667	0.808695	0.813999	0.816443	0.817897	0.825244		0.547375	0.590612	0.608931	0.610747	0.615402	0.617564	0.619033	0.62654
	150	BLASTN		0.925457	0.96283	0.97506	0.976234	0.979104	0.980691	0.984272	1		0.908407	0.953799	0.968532	0.970195	0.973517	0.975455	0.979693	0.99974
		Centrifuge		0.207735	0.245107	0.260615	0.266557	0.275103	0.286613	0.312765	0.378541		0.117961	0.14068	0.150143	0.153828	0.159076	0.166169	0.182415	0.222961
		Kraken		0.141465	0.162876	0.171447	0.173552	0.177308	0.180536	0.182272	0.186995		0.0752537	0.0871542	0.091929	0.0931092	0.095204	0.097022	0.0979992	0.100698
		MegaBLAST		0.253543	0.27645	0.287887	0.2903	0.294561	0.297918	0.300043	0.305833		0.142211	0.155913	0.162764	0.164167	0.166649	0.168575	0.169829	0.173323
		taxMaps		0.796892	0.840686	0.859174	0.860763	0.865278	0.867089	0.868411	0.875236		0.617963	0.659337	0.676886	0.678421	0.68259	0.684266	0.685664	0.693035
	250	BLASTN		0.953612	0.982859	0.991631	0.992057	0.993799	0.994234	0.995324	1		0.941049	0.976931	0.988042	0.988709	0.990659	0.991249	0.99268	0.999992
		Centrifuge		0.315446	0.367031	0.38894	0.396747	0.408329	0.423662	0.457809	0.544816		0.191346	0.226037	0.240869	0.246282	0.254218	0.264825	0.288737	0.348841
		Kraken		0.232475	0.265538	0.278796	0.281922	0.287639	0.292534	0.295105	0.302127		0.129034	0.148774	0.156689	0.158592	0.162027	0.164997	0.166571	0.170946
		MegaBLAST		0.395385	0.422993	0.437147	0.440118	0.445715	0.450015	0.452763	0.459538		0.237899	0.256135	0.265527	0.267404	0.270948	0.273599	0.275368	0.279882
		taxMaps		0.8797	0.91477	0.929346	0.930161	0.933233	0.934173	0.935198	0.940514		0.736091	0.772295	0.787286	0.788176	0.791223	0.792145	0.793295	0.799612
	300	BLASTN		0.957447	0.984838	0.992768	0.993087	0.994669	0.994992	0.995924	1		0.946858	0.979912	0.989925	0.990441	0.992217	0.99265	0.993824	0.99999
		Centrifuge		0.344618	0.398961	0.421786	0.429987	0.442214	0.458446	0.494702	0.588355		0.219111	0.257772	0.273988	0.280006	0.288842	0.300658	0.327294	0.394796
		Kraken		0.26197	0.298335	0.312942	0.31634	0.322656	0.328026	0.33082	0.338476		0.154076	0.177214	0.186489	0.1887	0.192731	0.196211	0.198041	0.203133
		MegaBLAST		0.437501	0.46531	0.479619	0.482675	0.488552	0.493052	0.495914	0.502678		0.280209	0.29992	0.310112	0.312157	0.316105	0.319042	0.321001	0.325818
		taxMaps		0.893427	0.925345	0.93845	0.939067	0.941792	0.942558	0.943507	0.948258		0.773544	0.807331	0.821078	0.821777	0.824527	0.825294	0.826368	0.83218
20	75	BLASTN		0.68526	0.735609	0.754714	0.761005	0.770766	0.784232	0.827481	0.999975		0.674929	0.73395	0.754017	0.760037	0.769706	0.782211	0.822429	0.996676
		Centrifuge		0.0631516	0.0762781	0.0821192	0.0847067	0.0882342	0.0933925	0.107094	0.141816		0.0330329	0.0400412	0.043167	0.0445598	0.0464461	0.0492188	0.0566053	0.0752294
		Kraken		0.031574	0.0368237	0.0390474	0.0396475	0.040598	0.0414756	0.0420197	0.0432914		0.0160013	0.0186876	0.0198286	0.0201365	0.0206242	0.0210755	0.0213557	0.02201
		MegaBLAST		0.0656274	0.0742282	0.0783725	0.0793903	0.0810457	0.0824574	0.0833675	0.0858454		0.0338009	0.0383101	0.0404863	0.0410204	0.0418856	0.0426204	0.0430953	0.0443976
		taxMaps		0.494195	0.543303	0.563498	0.566419	0.573424	0.577828	0.579799	0.588298		0.314043	0.349678	0.364463	0.366558	0.371614	0.374802	0.376327	0.382941
	125	BLASTN		0.869088	0.911772	0.926995	0.92965	0.934244	0.938849	0.95029	0.99999		0.848192	0.899416	0.917109	0.920231	0.925384	0.930193	0.942351	0.998239
		Centrifuge		0.117659	0.141126	0.151719	0.156104	0.16226	0.171302	0.194495	0.253771		0.0639249	0.0771614	0.0831656	0.085677	0.0891764	0.094341	0.107639	0.141334
		Kraken		0.0623928	0.0724968	0.0767884	0.0779152	0.0797422	0.0813988	0.0824379	0.0848402		0.0320514	0.0373446	0.0395971	0.0401905	0.0411493	0.0420241	0.042572	0.0438468
		MegaBLAST		0.126475	0.1399	0.146837	0.148399	0.15104	0.153214	0.154733	0.158556		0.06695	0.0742883	0.0780913	0.0789408	0.0803713	0.0815408	0.0823625	0.0844583
		taxMaps		0.589575	0.634216	0.653071	0.6549	0.659847	0.662124	0.663548	0.670694		0.394138	0.428805	0.443622	0.445036	0.448813	0.450541	0.451741	0.457879
	150	BLASTN		0.903208	0.942428	0.955737	0.957608	0.961022	0.963765	0.970499	1		0.88454	0.931664	0.94769	0.950017	0.953927	0.956952	0.96435	0.999492
		Centrifuge		0.129115	0.154473	0.165432	0.170272	0.177123	0.187064	0.21337	0.281443		0.0707709	0.0852742	0.0915543	0.0943619	0.0983135	0.104078	0.119426	0.158812
		Kraken		0.077154	0.0894982	0.0947399	0.0961215	0.0983562	0.100387	0.101633	0.10453		0.0398911	0.0464324	0.0492126	0.0499476	0.0511337	0.0522181	0.0528826	0.0544433
		MegaBLAST		0.154992	0.170215	0.178208	0.180003	0.183031	0.185514	0.187292	0.191626		0.083137	0.0916181	0.0960827	0.0970727	0.09874	0.10009	0.101066	0.103486
		taxMaps		0.647094	0.688622	0.706268	0.707759	0.712022	0.713735	0.715057	0.721874		0.44685	0.480763	0.495195	0.49641	0.499822	0.501176	0.502332	0.508456
	250	BLASTN		0.949214	0.979626	0.988975	0.989566	0.991472	0.992051	0.993676	1		0.936063	0.973169	0.984911	0.985805	0.98796	0.988686	0.990636	0.99998
		Centrifuge		0.20634	0.244318	0.261169	0.268035	0.278013	0.292559	0.329913	0.426907		0.119198	0.142635	0.15312	0.157484	0.163749	0.172936	0.196775	0.257912
		Kraken		0.132534	0.152877	0.161556	0.163775	0.167482	0.17082	0.172825	0.177516		0.0702413	0.0814871	0.0862775	0.0875157	0.0895702	0.0914378	0.0925601	0.0952153
		MegaBLAST		0.257166	0.27738	0.28826	0.290695	0.295035	0.298577	0.301116	0.306885		0.14466	0.156703	0.163226	0.164653	0.16718	0.169201	0.170681	0.174113
		taxMaps		0.72053	0.755299	0.769689	0.770507	0.773464	0.774371	0.775433	0.781089		0.519911	0.550053	0.562422	0.563134	0.565627	0.56637	0.567344	0.572697
	300	BLASTN		0.954568	0.983137	0.991728	0.992209	0.993895	0.994299	0.99544	1		0.943924	0.97808	0.988656	0.989301	0.991191	0.991697	0.993102	0.999975
		Centrifuge		0.227629	0.268444	0.286269	0.293675	0.304495	0.320169	0.360968	0.468119		0.137317	0.163871	0.175502	0.180456	0.187571	0.197953	0.22511	0.295183
		Kraken		0.151668	0.174625	0.184403	0.186871	0.191044	0.194791	0.19703	0.20228		0.0848345	0.0982837	0.104005	0.105471	0.107922	0.11015	0.111486	0.114641
		MegaBLAST		0.290061	0.311079	0.322399	0.324973	0.329652	0.333478	0.336215	0.342229		0.173273	0.186682	0.193958	0.195564	0.198449	0.200758	0.202442	0.20625
		taxMaps		0.725356	0.757044	0.769872	0.770506	0.773143	0.773867	0.774838	0.779878		0.540793	0.56908	0.58043	0.581002	0.583283	0.583894	0.5848	0.589733
