# Supplementary material for: taxMaps: comprehensive and highly accurate taxonomic classification of short-read data in reasonable time
Source: HighWire-hosted journal article supplement (doi:10.1101/gr.225276.117), 2018-03-27
Supplement: Supplemental_Table_S4.xlsx [file Supplemental_Table_S4.xlsx]

## Sheet: Sheet1
Supplemental Table S4 | Classification F-score on two mock metagenomics communities
Dataset	Program		Genus	Family	Order	Class	Phylum	Kingdom
HiSeq	BLASTN		0.952978	0.954803	0.956517	0.958562	0.966193	0.969012
	DIAMOND		0.807299	0.811068	0.814648	0.820472	0.829908	0.834441
	Centrifuge		0.926542	0.927761	0.928979	0.930556	0.934973	0.93762
	Kaiju		0.873463	0.87907	0.88364	0.890193	0.901363	0.908856
	Kraken		0.918104	0.919227	0.920284	0.921602	0.924299	0.926202
	MegaBLAST		0.924686	0.92629	0.927339	0.9288	0.931984	0.934184
	taxMaps		0.951413	0.9519	0.953678	0.95469	0.958996	0.961408
MiSeq	BLASTN		0.944412	0.976973	0.977864	0.982635	0.983466	0.985476
	DIAMOND		0.818776	0.907646	0.908774	0.91391	0.91592	0.919907
	Centrifuge		0.922194	0.939179	0.93946	0.944242	0.946223	0.949668
	Kaiju		0.833832	0.932674	0.934126	0.941506	0.944676	0.949346
	Kraken		0.922707	0.938706	0.938988	0.941676	0.942394	0.944377
	MegaBLAST		0.914618	0.938971	0.939872	0.945256	0.946143	0.948219
	taxMaps		0.944238	0.960213	0.960484	0.961809	0.962867	0.964524
